# Supplementary material
Source: PubMed Central journal article supplement (PMC1765484)

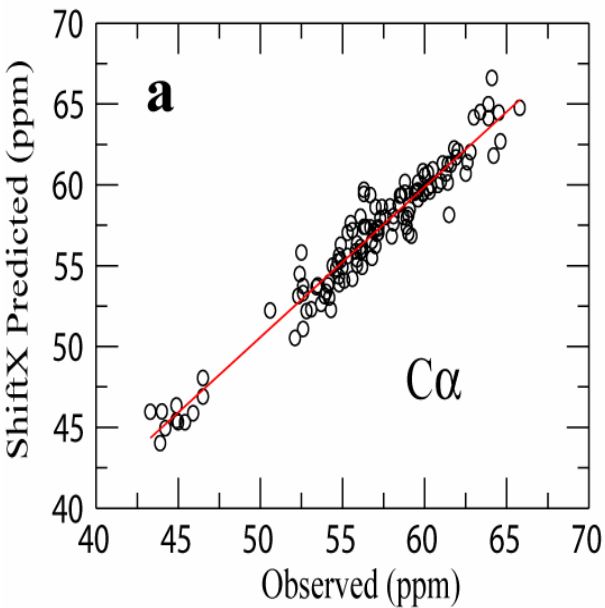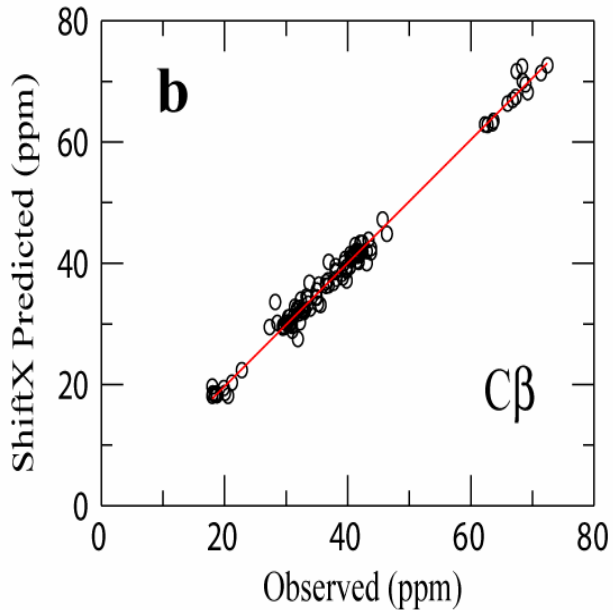

Supplement: pnas_0609033103_1.pdf [file pnas_0609033103_1.pdf]

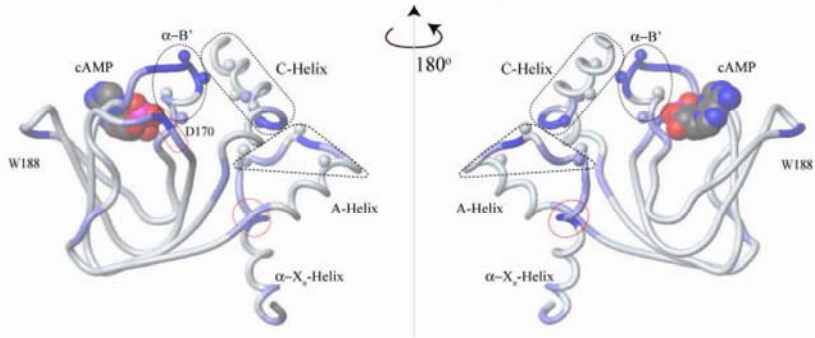

Supplement: pnas_0609033103_2.pdf [file pnas_0609033103_2.pdf]
